# Supplementary material for: Poly[2,2′-(4,4′-bipyridine)-5,5′-bibenzimidazole] functionalization of carbon black for improving the oxidation stability and oxygen reduction reaction of fuel cells
Source: Royal Society of Chemistry journal article supplement (doi:10.1039/d0ra04289g), 2020-01-01
Supplement: d0ra04289g1.pdf [file d0ra04289g1.pdf]

## Supplementary information (ESI)

### Poly[2,2'-(4,4'-bipyridine)-5,5'-bibenzimidazole] functionalization of Carbon Black for improving Oxidation Stability and Oxygen Reduction Reaction of Fuel Cells

Mohamed R. Berber,<sup>\*a,b</sup> Mohamad Y. Mustafa<sup>c</sup>

<sup>a</sup> Chemistry Department, College of Science, Jouf University, Sakaka 2014, Saudi Arabia

<sup>b</sup> Department of Chemistry, Faculty of Science, Tanta University, Tanta 31527, Egypt

<sup>c</sup> Institute of Buildings, Energy and Material Technology, Faculty of Engineering Science and Technology, The Arctic University of Norway, Norway

\*Corresponding author: [mrberber@science.tanta.edu.eg](mailto:mrberber@science.tanta.edu.eg); [mrberber@ju.edu.sa](mailto:mrberber@ju.edu.sa)

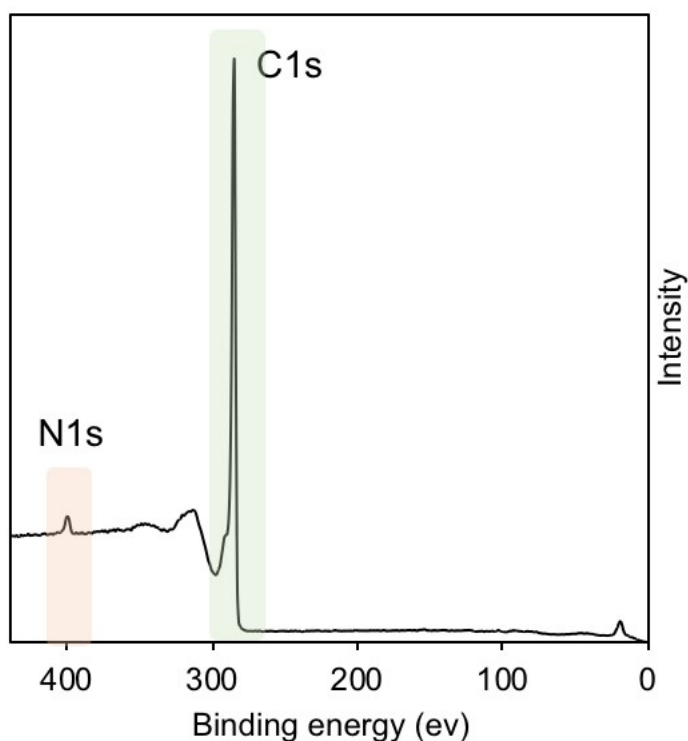

Fig. S1. XPS survey scan of BiPyPBI/CB composite.

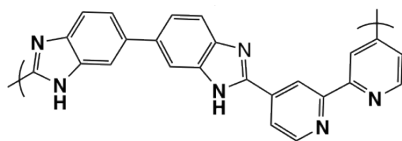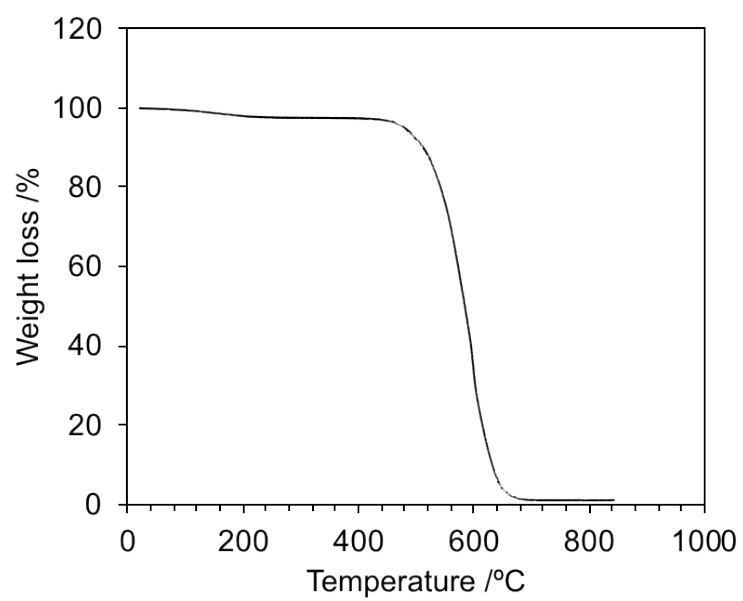

Fig. S2. TGA of BiPyPBI polymer

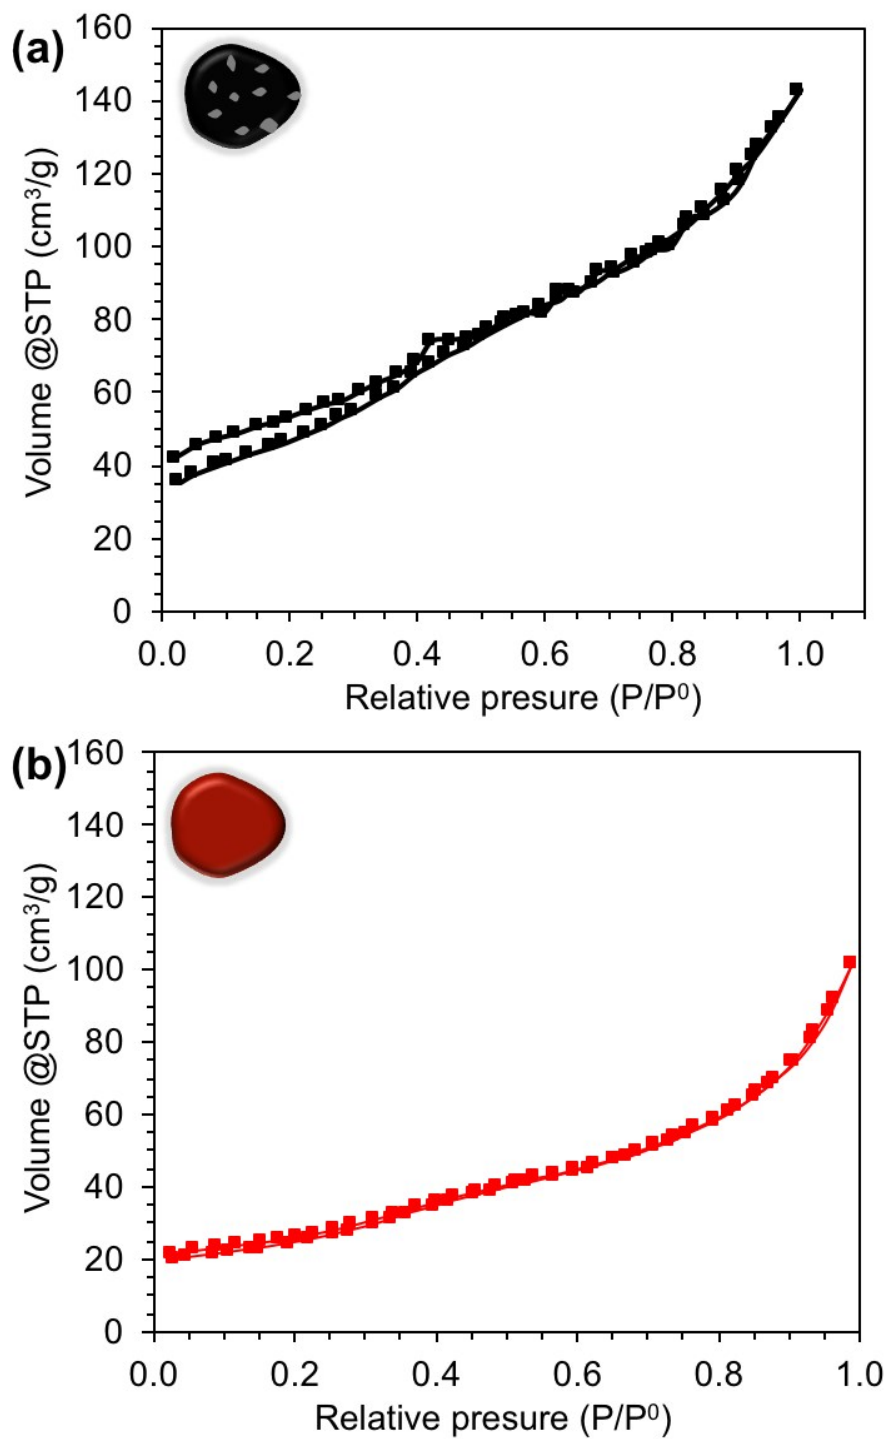

Fig. S3. Nitrogen-gas adsorption isotherm of: (a) Pt/BiPyPBI/CB and (b) Pt/C composites.

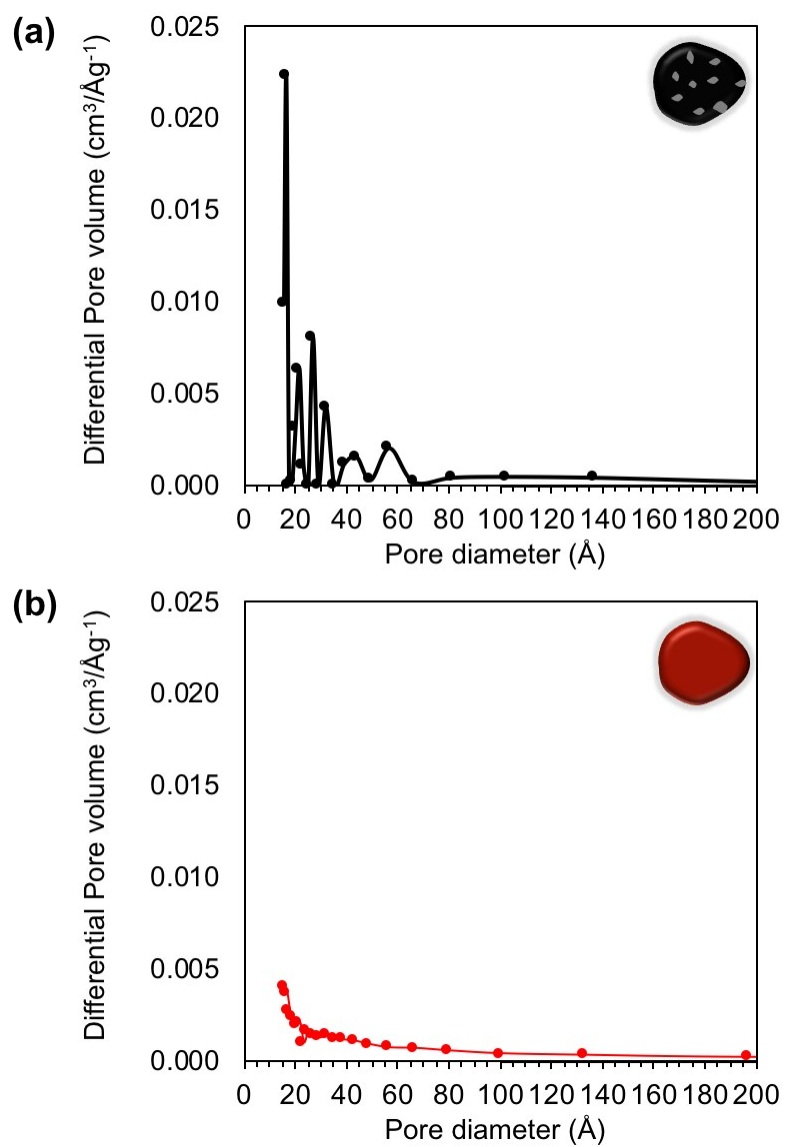

Fig. S4. Particle size distribution of Pt-NPs of: (a) CB, and (b) BiPyPBI/CB composites.
